# Supplementary material for: High-Fat Diet Propelled AOM/DSS-Induced Colitis-Associated Colon Cancer Alleviated by Administration of Aster glehni via STAT3 Signaling Pathway
Source: PubMed Central journal article supplement (PMC7168234; doi:10.3390/biology9020024), 2020-02-02
Supplement: biology-09-00024-s001.pdf [file biology-09-00024-s001.pdf]

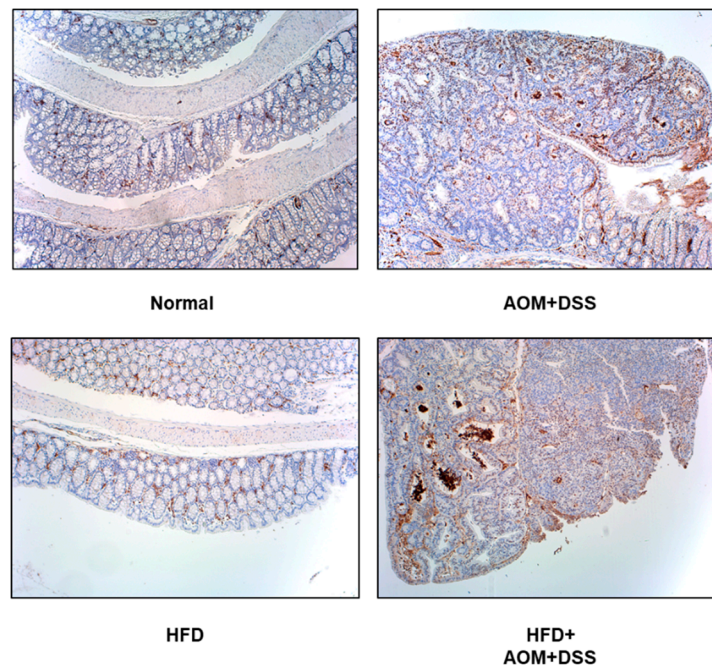

**Supplementary Figure S1.** Effects of HFD on the activation of STAT3 in the AOM/DSS-induced CAC mice model. The manifestation of pSTAT3 (Tyr705) in the colon tissues were performed by immunohistochemistry (original magnification, 100×).
